# Supplementary material for: Influence of aliovalent cation substitution on structural and electrical properties of Gd2(Zr1−xMx)2O7−δ (M = Sc, Y) systems
Source: Royal Society of Chemistry journal article supplement (doi:10.1039/c5ra17203a), 2015-01-01
Supplement: c5ra17203a1.pdf [file c5ra17203a1.pdf]

## Supplementary Information to

### Influence of Aliovalent Cation substitution on structural and electrical properties of $Gd_2(Zr_{1-x}M_x)_2O_{7-\delta}$ (M = Sc, Y) system

Vaisakhan Thampi D. S., Prabhakar Rao Padala\*, Renju U. A.

Materials Science and Technology Division, National Institute for Interdisciplinary Science and Technology (NIIST), Trivandrum, India-695019

\*Corresponding author. Tel.: + 91 471 2515311; Fax: + 91 471 2491712  
E-mail: padala\_rao@yahoo.com

Table S1: Refined fitting parameters of Rietveld analysis

|                        | <b>GZ</b> | <b>GZY1</b> | <b>GZY2</b> | <b>GZY3</b> | <b>GZY4</b> | <b>GZS1</b> | <b>GZS2</b> | <b>GZS3</b> |
|------------------------|-----------|-------------|-------------|-------------|-------------|-------------|-------------|-------------|
| <b>Flat background</b> | 186.9829  | 194.1553    | 177.678     | 179.4647    | 161.7568    | 176.7341    | 166.3954    | 168.047     |
| <b>Coefficient 1</b>   | -21.3647  | -26.3029    | -24.3479    | -26.1509    | -17.2779    | -30.1538    | -28.4476    | -29.2692    |
| <b>Coefficient 2</b>   | 22.45977  | 23.73738    | 34.15881    | 34.80234    | 35.35935    | 30.7739     | 25.92725    | 26.53172    |
| <b>Scale Factor</b>    | 0.000181  | 0.000187    | 0.000158    | 0.000161    | 0.000133    | 0.000181    | 0.000175    | 0.000164    |
| <b>U</b>               | 0.035581  | 0.0379      | 0.057153    | 0.142995    | 0.082256    | 0.097383    | 0.093578    | 0.056999    |
| <b>V</b>               | -0.0019   | -0.00205    | -0.00735    | -0.06603    | -0.02238    | -0.02184    | 0.017424    | 0.016612    |
| <b>W</b>               | 0.003596  | 0.003063    | 0.004667    | 0.013923    | 0.006291    | 0.007278    | -0.00019    | 0.001149    |
| <b>Peak Shape 1</b>    | 0.875262  | 0.651668    | 0.510645    | 0.661708    | 1.031867    | 0.587736    | 0.478828    | 0.195308    |
| <b>Peak Shape 2</b>    | 0.00502   | 0.006852    | 0.007872    | 0.00552     | 0.003654    | 0.007718    | 0.007572    | 0.012047    |

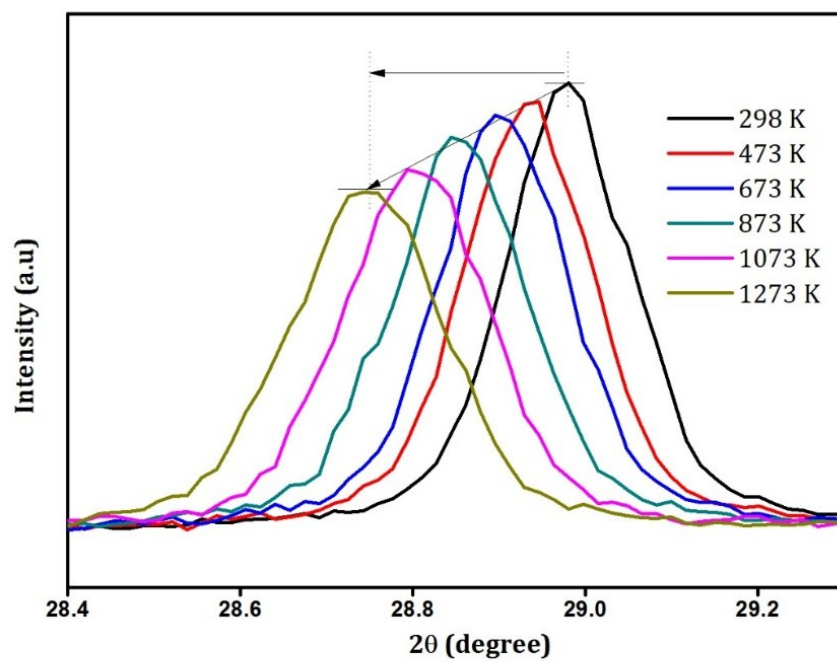

Figure S1: Effect of temperature on the (111) peak of GZY3 sample.

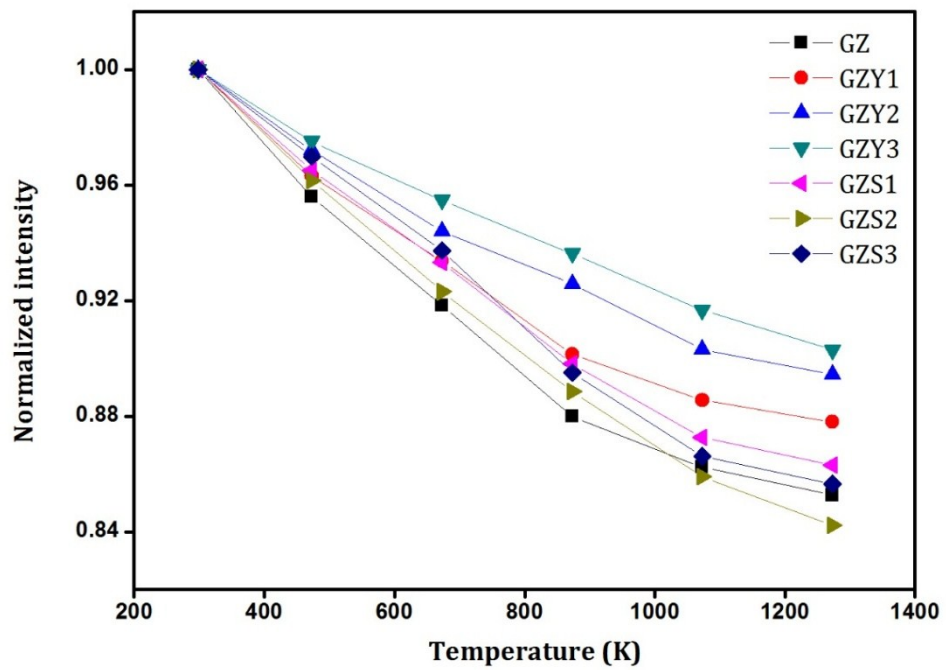

Figure S2: Change in intensity of the (111) XRD peak of various samples with temperature.

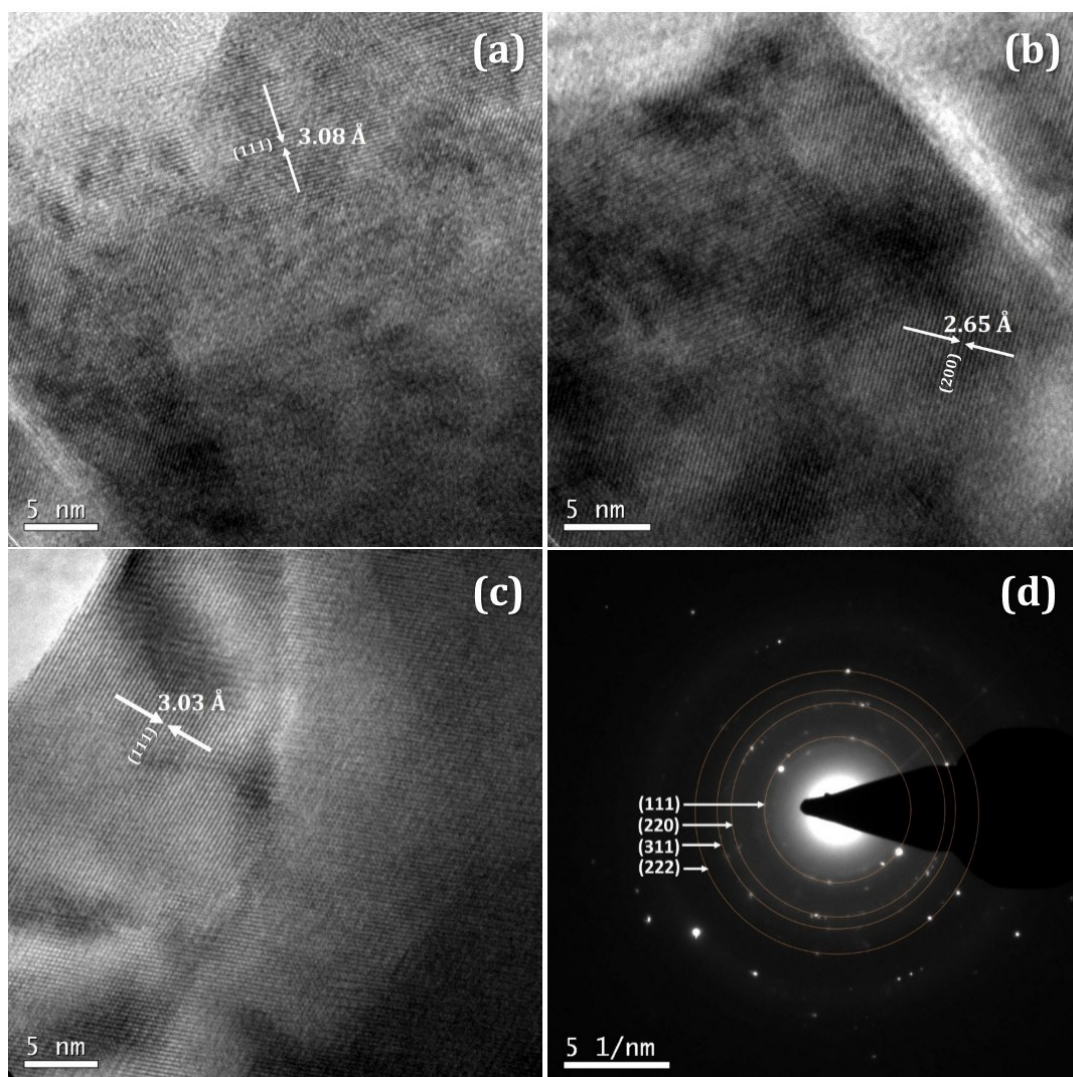

Figure S3: TEM images of various samples. (a),(b) and (c) show the HR-TEM images of GZ, GZY3 and GZS3 respectively.(d) shows the SAED pattern of GZY3.
